# Supplementary material for: Absence of HDAC3 by Matrix Stiffness Promotes Chromatin Remodeling and Fibroblast Activation in Idiopathic Pulmonary Fibrosis
Source: Cells. 2023 Mar 27;12(7):1020. doi: 10.3390/cells12071020 (PMC10093275; doi:10.3390/cells12071020)
Supplement: Supplementary file 1 [file cells-12-01020-s001.zip › cells-2207322-supplementary.pdf]

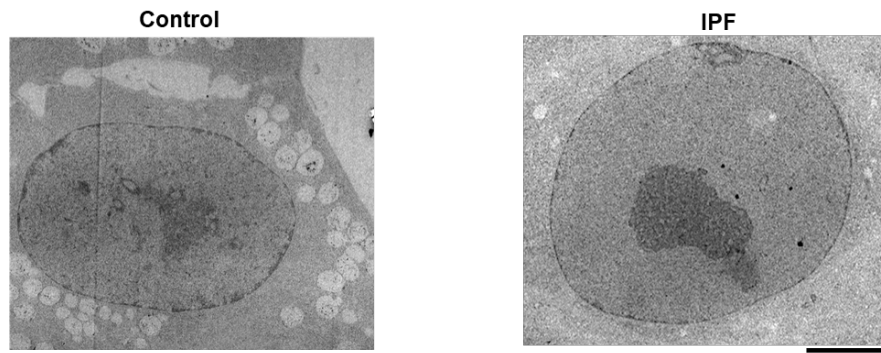

**Figure S1. Increased nuclear are in IPF by transmission electron microscopy.** a Representative transmission electron microscopy of control and fibroblast nuclei. Scale bar: 5µm.

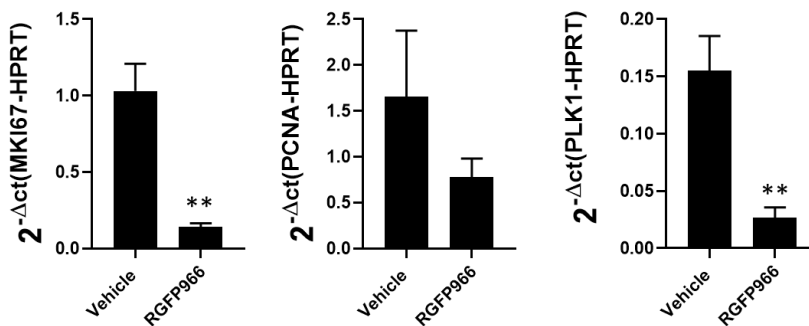

**Figure S2. Pharmacological inhibition of HDAC3 by RGFP966 regulates the expression of cell proliferation genes.** qPCR analysis of fibrosis-related genes: MKi67, PCNA, and PLK1, control fibroblasts treated with RGFP966 10µM for 24 hours from three independent experiments. \*\*P < 0.01 by unpaired t-student test.

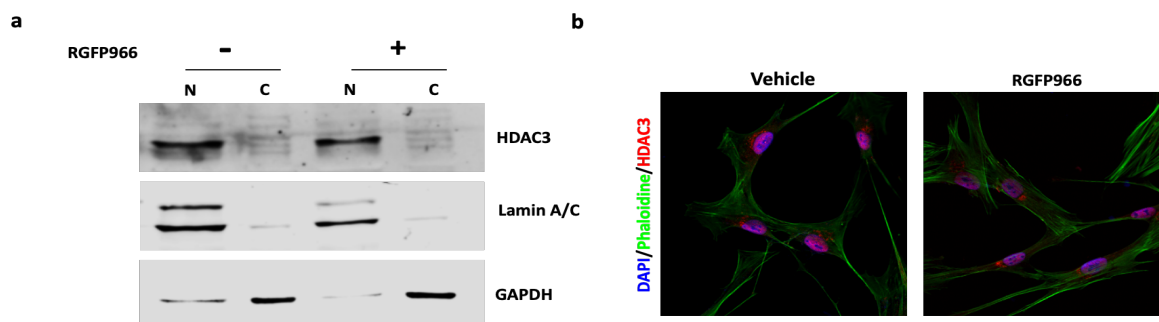

**Figure S3. Absence of nuclear HDAC3 translocation after RGFP966 treatment.** (a) Representative immunoblots of HDAC3 from nuclear and cytoplasmic extracts of fibroblasts treated or not with RGFP966 (1µM) for 24 hours. (b) Immunofluorescence images of HDAC3 in control fibroblast non-treated and treated with RGFP966, HDAC3 (red), phalloidin (green), and DAPI (blue).
